# Supplementary material
Source: PubMed Central journal article supplement (PMC6445678)

## **Supporting Information**

### **Diphenyl Phosphate-Induced Toxicity During Embryonic Development**

Constance A. Mitchell<sup>†</sup>, Aalekhya Reddam<sup>†</sup>, Subham Dasgupta<sup>†</sup>, Sharon Zhang<sup>‡</sup>, Heather M. Stapleton<sup>‡</sup>, David C. Volz<sup>†,\*</sup>

<sup>†</sup>Department of Environmental Sciences, University of California, Riverside, California 92521, United States

<sup>‡</sup>Division of Environmental Sciences and Policy, Duke University, Durham, North Carolina 27708, United States

\*E-mail: david.volz@ucr.edu.

6 Pages

4 Figures

## Figure Legends

Figure S1. Effect of DPHP on survival rate or hatch rate at 72 hpf. Representative images of fixed and zn-8-labeled 72-hpf embryos under transmitted or fluorescence (A); white line denotes SV-BA length. Embryo survival and hatch rate for 24-72 hpf, 30-72 hpf, and 48-72 hpf exposures (B,C,D).

Figure S2. Effect of DPHP at 30 and 48 hpf following initiation of exposure at 24 hpf. Mean body length ( $\pm$  standard deviation) for 24-30 hpf and 24-48 hpf exposures (A,B); mean yolk sac area ( $\pm$  standard deviation) for 24-30 hpf and 24-48 hpf exposures (C,D).

Figure S3. Effect of DPHP on morphological endpoints at 72 hpf. Mean body length ( $\pm$  standard deviation) (A), yolk sac area ( $\pm$  standard deviation) (B), and pericardial area ( $\pm$  standard deviation) (C) for 24-, 30-, and 48-72 hpf exposures. Asterisk (\*) denotes significant treatment ( $p < 0.05$ ) relative to system water controls.

Figure S4. Effect of mannitol, fenretinide, and HX 531 on DPHP-induced effects on body length and yolk sac area. Mean body length ( $\pm$  standard deviation) (A) and yolk sac area ( $\pm$  standard deviation) (B) of 72-hpf embryos pre-treated with vehicle (0.1% DMSO), 2  $\mu$ M fenretinide, 5  $\mu$ M HX 531, or 175 mM D-Mannitol from 24 to 30 hpf, and then treated with vehicle (0.1% DMSO), 1000  $\mu$ M DPHP, or 20  $\mu$ M TPHP from 30 to 72 hpf. Asterisk (\*) denotes significant treatment effect ( $p < 0.05$ ) relative to vehicle controls (0.1% DMSO).

Figure S1.

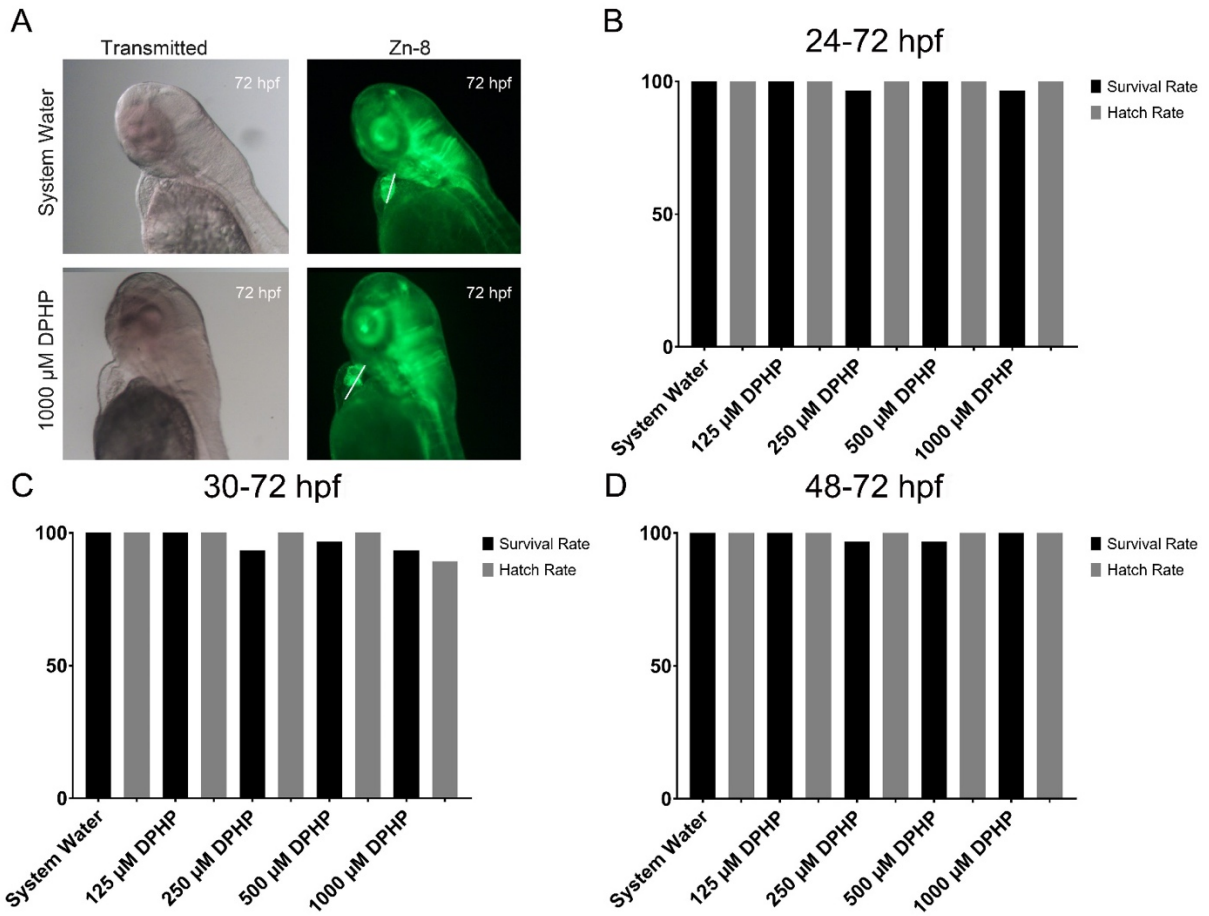

Figure S2.

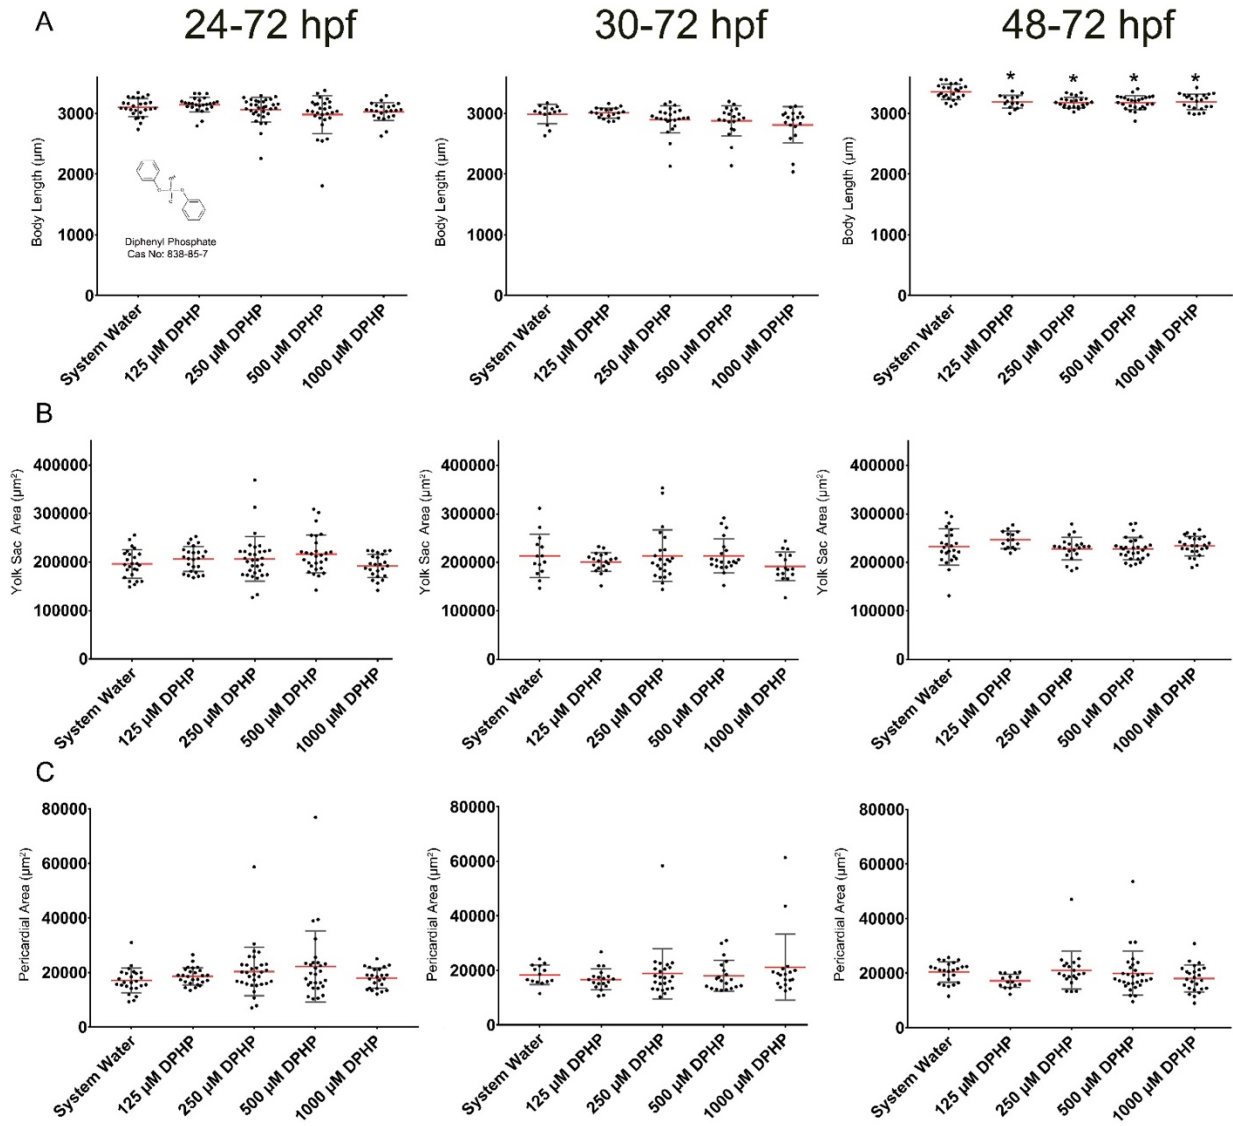

Figure S3.

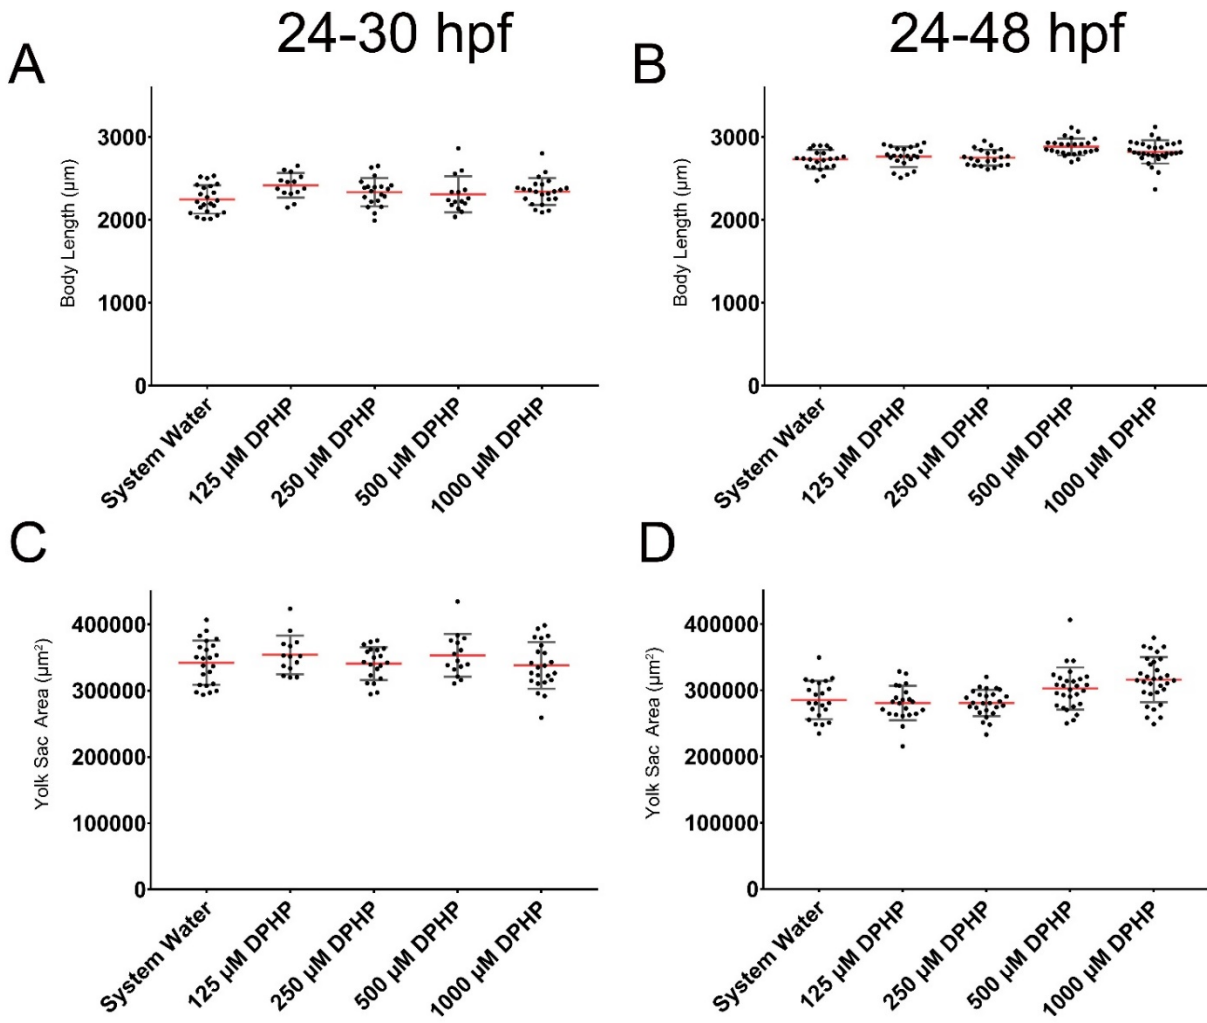

Figure S4.

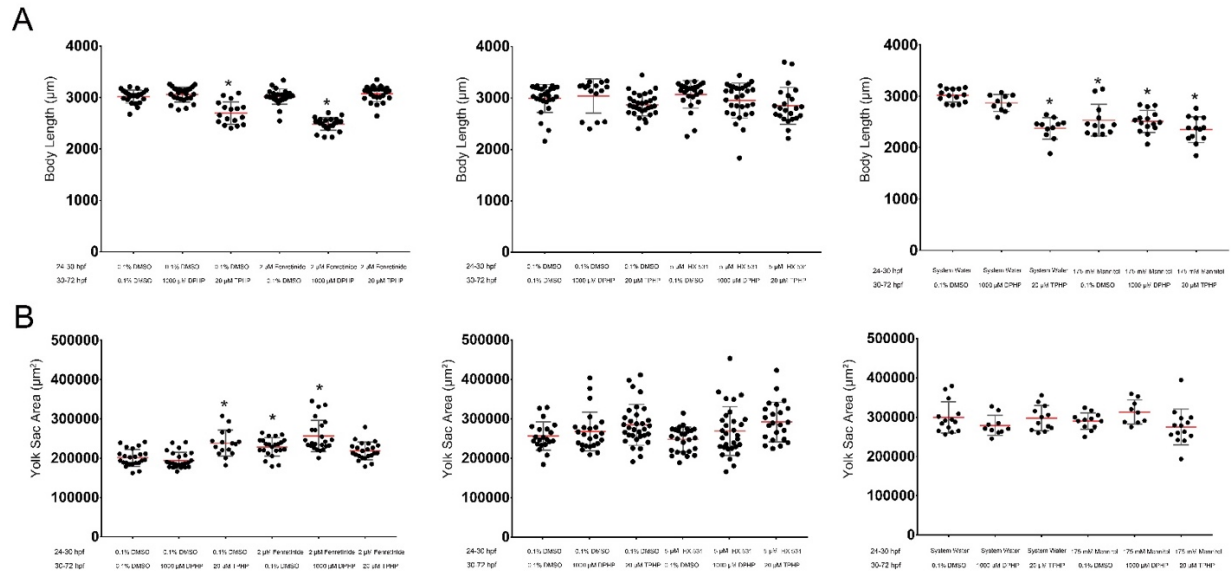

Supplement: NIHMS1019392-supplement-SI_002.pdf [file NIHMS1019392-supplement-SI_002.pdf]
